# Supplementary material
Source: PubMed Central journal article supplement (PMC8166306)
Supplement: AET2-5-e10535-s001.pdf [file AET2-5-e10535-s001.pdf]

## Data Supplement S1. Supplemental material

### Appendix S1

#### Addended Study Questionnaire

**Section 1: Maslach Burnout Inventory** (we are unable to reproduce the complete inventory here due to copyright)

#### Section 2: Career Plans

What are your career plans after completing residency training?

- Fellowship or additional education/training
- Practice primarily in an academic medical center/teaching hospital
- Practice primarily in a community-based hospital
- Practice primarily in a Veterans hospital
- Practice primarily in an urgent care setting
- Active military practice
- Other: \_\_\_\_\_

#### Section 3: Demographics

Gender:

- Male
- Female

Age:

Current PGY-Level:

- 1
- 2
- 3
- 4

Total Individual Educational Debt:

- ≤50,000
- 50,001 – 100,000
- 100,001 – 150,000
- 150,001 – 200,000
- 200,001 – 250,000
- >250,000

**This concludes the survey. Thank you for your participation and we look forward to seeing you at the focus group!**

## **Appendix S2**

### **Addended Focus Group Protocol**

#### **INTRODUCTORY QUESTION**

1. Can anyone describe a time in residency when they felt burned out?
  - a. Follow-up #1: What aspects of residency do you think contributed to your burnout?

#### **QUESTIONS ABOUT INFLUENCE OF BURNOUT ON CAREER DECISIONS**

Can we go around the group and have each person announce his/her career plans after residency if you know them?

2. Who feels their experience with burnout influenced their career choice? If so, how?
  - a. Follow-up #1: Do you feel you would have chosen a different career path if you experienced less burnout? How?

#### **SUMMARY QUESTIONS**

3. We want to understand as much about how burnout influences your residency experience as we can. Are there other things related to burnout during residency and education that you feel we should talk about?
